# Supplementary material for: Identification of distinct quantitative trait loci associated with defence against the closely related aphids Acyrthosiphon pisum and A. kondoi in Medicago truncatula
Source: PubMed Central journal article supplement — J Exp Bot. 2012 Mar 21;63(10):3913–22. doi: 10.1093/jxb/ers084 (PMC3388833; doi:10.1093/jxb/ers084), 2012-03-21

**Identification of distinct quantitative trait loci associated  
with defence against the closely related aphids  
*Acyrtosiphon pisum* and *A. kondoi* in *Medicago truncatula***

*Su-min Guo, Lars G Kamphuis, Ling-Ling Gao, John P Klingler, Judith Lichtenzveig,  
Owain R Edwards, and Karam B Singh*

**Supplementary Material**

Figure S1. Settling of pea aphid alatae in a choice test conducted in a growth chamber. Values are mean and standard error of six biological replicates. The difference between the plant lines was not significant (Prob /t/ > 0.2390, df = 5; paired *t*-test for either the mean or sum of aphids numbers per line per block for each of the time points).

Table S1 – see separate file

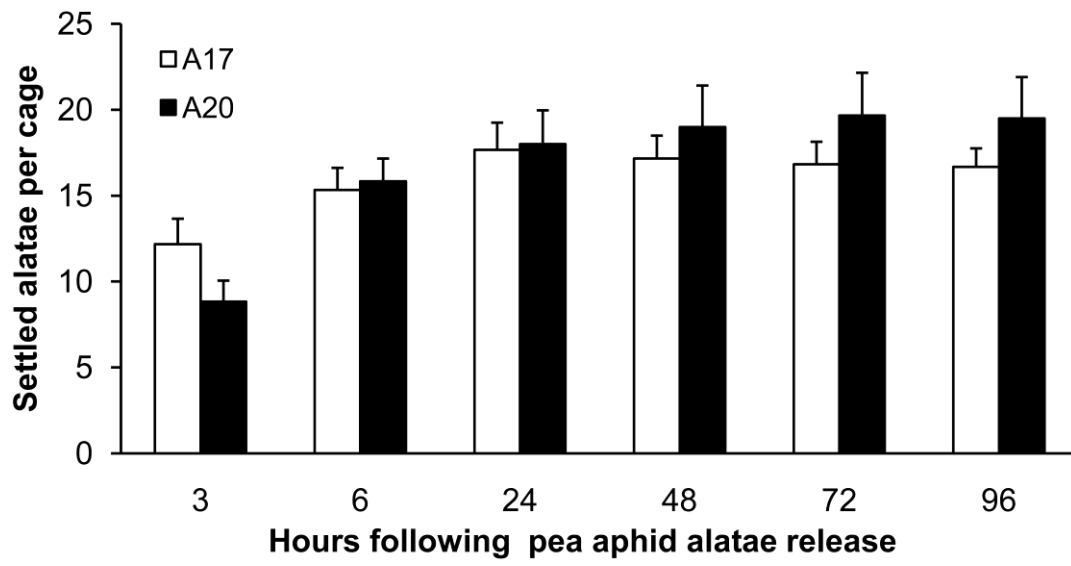

Supplement: supp_ers084_00070680-file001.pdf [file supp_ers084_00070680-file001.pdf]
